# Supplementary material for: Reactivity of presolvated and solvated electrons with CO2 in water up to 118 bar at 298 and 308 K
Source: Royal Society of Chemistry journal article supplement (doi:10.1039/d3cp01535a), 2023-01-01
Supplement: d3cp01535a1.pdf [file d3cp01535a1.pdf]

**Supporting Information:**  
**Reactivity of presolvated electrons with  
supercritical CO<sub>2</sub> in water**

Denis Dobrovolskii, Mehran Mostafavi, and Sergey A. Denisov\*

*Institute de Chimie Physique UMR 8000, CNRS/Université Paris-Saclay, Bâtiment 349,  
Orsay, 91405, France*

E-mail: [sergey.denisov@universite-paris-saclay.fr](mailto:sergey.denisov@universite-paris-saclay.fr)

## The radiolytic yield of $e_{\text{hyd}}^-$ in $\text{CO}_2$ -water system

The equations for calculating the Radiolytic yield of  $e_{\text{hyd}}^-$  are as below:

$$G(t) = \frac{A_{e_{\text{aq}}^-}(\lambda t)}{\varepsilon_{\lambda} \cdot d \cdot F \cdot D} \quad (1a)$$

where  $d$  is optical path-length,  $D$  – dose, and the dose factor  $F$  is:

$$F = \rho_{\text{sol}} \times \frac{p \times \frac{Z_{\text{solute}}}{M_{\text{solute}}} + (100-p) \times \frac{Z_{\text{H}_2\text{O}}}{M_{\text{H}_2\text{O}}}}{\frac{100 \times Z_{\text{H}_2\text{O}}}{M_{\text{H}_2\text{O}}}} \quad (1b)$$

Where  $\rho_{\text{sol}}$  is the density of the solution,  $p$  is the solute weight fraction per 100 g. of solution,  $Z_{\text{solute}}$  and  $Z_{\text{H}_2\text{O}}$  are the number of electrons per molecule for the solute and  $\text{H}_2\text{O}$ , respectively,  $M_{\text{solute}}$  and  $M_{\text{H}_2\text{O}}$  are the molecular weights of the solute and  $\text{H}_2\text{O}$  respectively, and the extinction coefficients of  $e_{\text{hyd}}^-$  are well known in previous articles.

## The physico-chemical properties of the $\text{CO}_2$ solutions

Table S1: at 25°C.

| P,<br>bar | $c_{\text{CO}_2}^{25^\circ\text{C}}$ ,<br>M | $\rho_{\text{sol}}^{25^\circ\text{C}}$ ,<br>kg/m <sup>3</sup> | $p$    | $f_s$ | $F^{25^\circ\text{C}}$ ,<br>kg/m <sup>3</sup> |
|-----------|---------------------------------------------|---------------------------------------------------------------|--------|-------|-----------------------------------------------|
| 1.0       | 0.033                                       | 996.4                                                         | 0.0015 | 0.001 | 997                                           |
| 9.1       | 0.290                                       | 999.6                                                         | 0.013  | 0.005 | 1000                                          |
| 13.6      | 0.421                                       | 1001.2                                                        | 0.019  | 0.008 | 1001                                          |
| 22.3      | 0.654                                       | 1004.1                                                        | 0.029  | 0.012 | 1003                                          |
| 35.0      | 0.943                                       | 1007.8                                                        | 0.041  | 0.017 | 1008                                          |
| 47.0      | 1.164                                       | 1010.9                                                        | 0.051  | 0.021 | 1010                                          |
| 50.5      | 1.220                                       | 1011.6                                                        | 0.053  | 0.022 | 1011                                          |
| 57.3      | 1.316                                       | 1013.0                                                        | 0.057  | 0.024 | 1013                                          |
| 63.6      | 1.380                                       | 1014.0                                                        | 0.060  | 0.026 | 1014                                          |
| 70.2      | 1.395                                       | 1015.0                                                        | 0.060  | 0.026 | 1015                                          |
| 80.8      | 1.414                                       | 1016.2                                                        | 0.061  | 0.026 | 1016                                          |
| 90.9      | 1.432                                       | 1016.9                                                        | 0.062  | 0.026 | 1017                                          |
| 98.0      | 1.443                                       | 1017.2                                                        | 0.062  | 0.026 | 1017                                          |
| 118.2     | 1.473                                       | 1016.9                                                        | 0.064  | 0.027 | 1017                                          |

Table S2: at 35°C.

| P,<br>bar | $c_{\text{CO}_2}^{35^\circ\text{C}}$ ,<br>M | $\rho_{\text{sol}}^{35^\circ\text{C}}$ ,<br>kg/m <sup>3</sup> | $p$   | $f_s$ | $F^{35^\circ\text{C}}$ ,<br>kg/m <sup>3</sup> |
|-----------|---------------------------------------------|---------------------------------------------------------------|-------|-------|-----------------------------------------------|
| 2.0       | 0.05                                        | 993.4                                                         | 0.002 | 0.001 | 1001                                          |
| 11.5      | 0.29                                        | 996.4                                                         | 0.013 | 0.005 | 1005                                          |
| 18.7      | 0.44                                        | 998.5                                                         | 0.020 | 0.008 | 1007                                          |
| 31.8      | 0.70                                        | 1001.9                                                        | 0.031 | 0.013 | 1012                                          |
| 45.0      | 0.92                                        | 1004.9                                                        | 0.040 | 0.017 | 1016                                          |
| 58.8      | 1.10                                        | 1007.3                                                        | 0.048 | 0.020 | 1019                                          |
| 72.0      | 1.23                                        | 1009.1                                                        | 0.054 | 0.023 | 1022                                          |
| 82.0      | 1.27                                        | 1009.9                                                        | 0.055 | 0.023 | 1022                                          |
| 92.0      | 1.29                                        | 1010.4                                                        | 0.056 | 0.024 | 1022                                          |
| 105.0     | 1.31                                        | 1011.1                                                        | 0.057 | 0.024 | 1023                                          |

where  $f_s$  is the electron fraction of  $\text{CO}_2$ ,  $p$  is the weight fraction of the solute, and  $F$  is a dose factor based on the electron density of the solution. The  $\text{CO}_2$  concentrations at different pressures were determined according to  $c = f(P)$  dependence. Measurements were taken at different temperatures for a variety of pressures, so the pressures for different temperatures are not the same.

## Optical cell for liquid–gas system spectroscopy

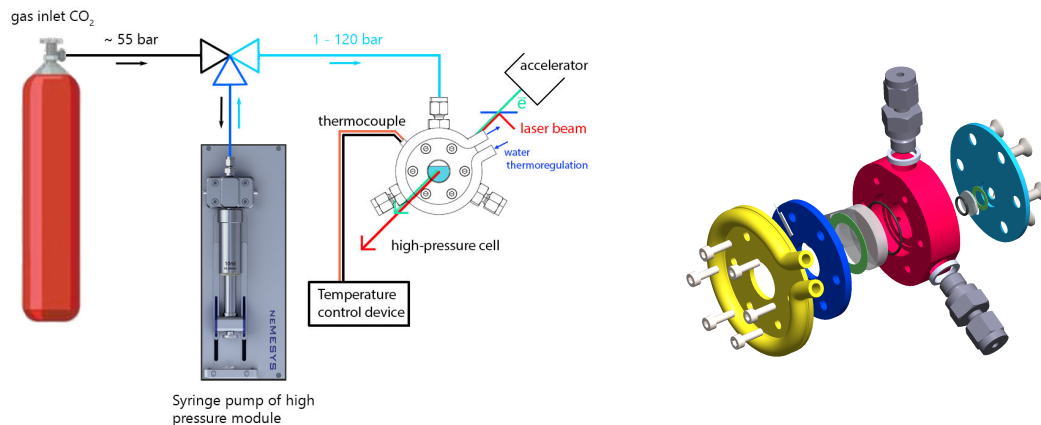

Figure S1: The schematic representation of the experiment setup.

## Extra data

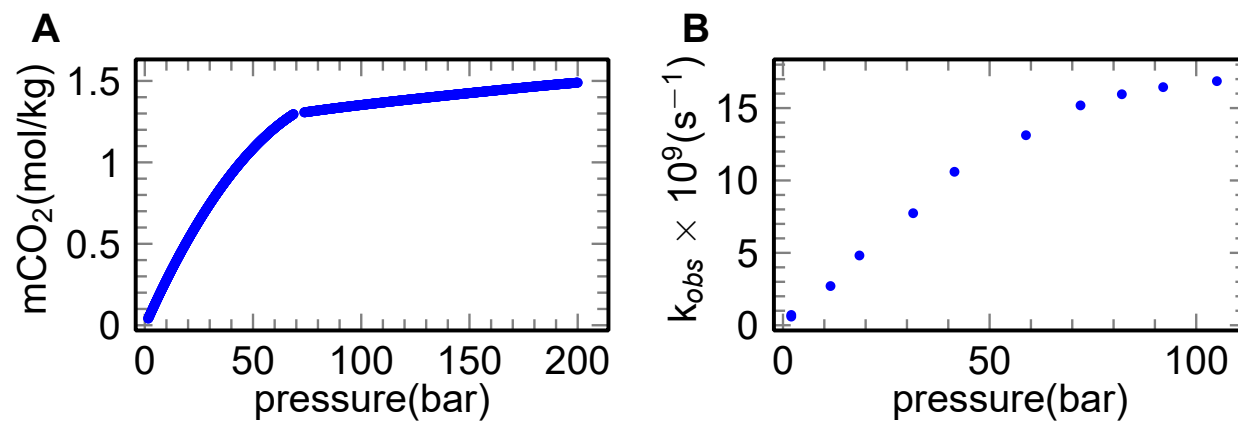

Figure S2: Pulse radiolysis data of a water – CO<sub>2</sub> system at different pressures (A) and comparison with molar concentration(B).

To learn more about the calculation of the molarity of CO<sub>2</sub>, refer to this Jupyter notebook:  
Carbon dioxide solubility in water as a function of pressure and temperature.

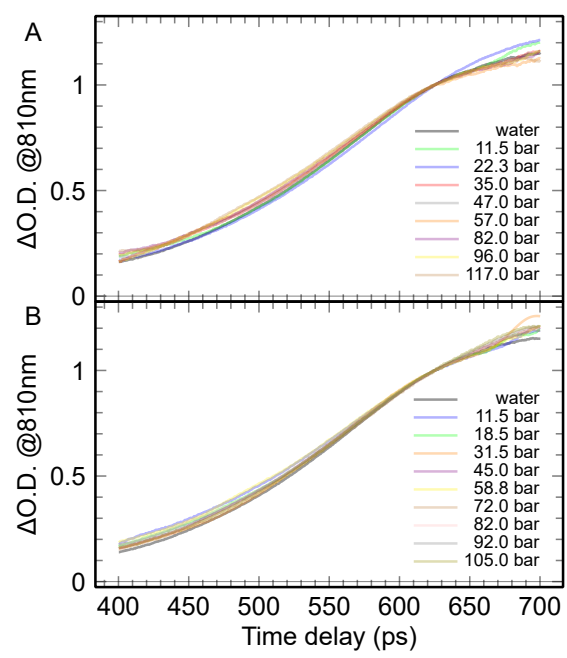

Figure S3: The absorption spectra of  $e_{hyd}^-$  electron at 10-20 ps time range after the electron pulse: A – 25°C, B – 35°C.
